# Supplementary material
Source: publisher figshare collection journal article supplement (https://frontiersin.figshare.com/ndownloader/files/10666396)
Supplement: Supplementary file [file 10666396]

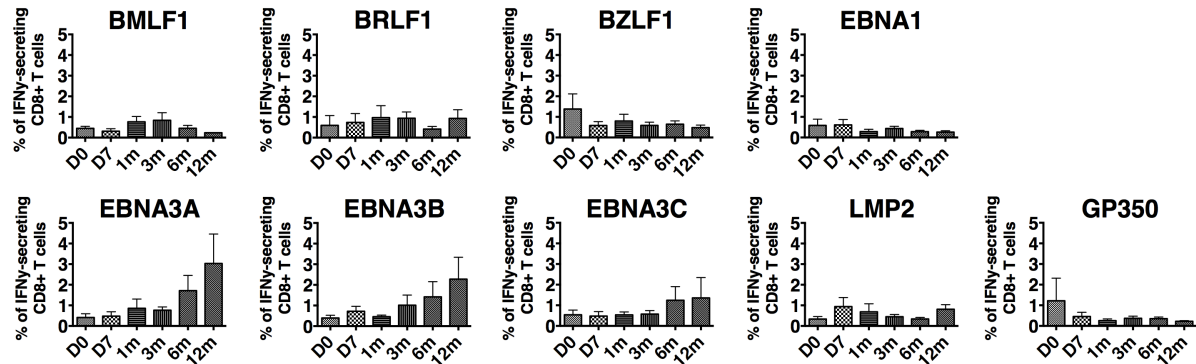

**Supplementary Figure 3. Proportion of EBV-specific interferon-gamma producing CD8+ T cells towards EBV lytic and latent antigen peptide pools detected by flow cytometry.** The mean  $\pm$  SEM of T cell responses in IM19-29 along 6 time points was shown. Decreases in T cell responses towards EBV lytic peptide pools (BZLF1, GP350) together with increases in T cell responses towards EBV latent peptide pools (EBNA3A, EBNA3B, EBNA3C) were identified in flow cytometric assays.
